# Supplementary material
Source: PubMed Central journal article supplement (PMC4217224)

# Synthesis and characterization of perfluoro-*tert*-butyl semifluorinated amphiphilic polymers and their potential application in hydrophobic drug delivery.

Sarah Decato,<sup>a</sup> Troy Bemis,<sup>a</sup> Eric Madsen<sup>a</sup> and Sandro Mecozzi<sup>b</sup>

## Supporting Information

### Table of Contents

|                                                                             |         |
|-----------------------------------------------------------------------------|---------|
| <sup>1</sup> H-NMR spectrum for mPEG <sub>550</sub> -OMs.                   | Page 3  |
| <sup>1</sup> H-NMR spectrum for mPEG <sub>550</sub> -OPFtB <sub>Mono</sub>  | Page 4  |
| <sup>19</sup> F-NMR spectrum for mPEG <sub>550</sub> -OPFtB <sub>Mono</sub> | Page 5  |
| MS spectrum and HPLC trace for mPEG <sub>550</sub> -OPFtB <sub>Mono</sub>   | Page 6  |
| <sup>1</sup> H-NMR spectrum for mPEG <sub>1k</sub> -OPFtB <sub>Mono</sub>   | Page 7  |
| <sup>19</sup> F-NMR spectrum for mPEG <sub>1k</sub> -OPFtB <sub>Mono</sub>  | Page 8  |
| MS spectrum and HPLC trace for mPEG <sub>1k</sub> -OPFtB <sub>Mono</sub>    | Page 9  |
| <sup>1</sup> H-NMR spectrum for mPEG <sub>2k</sub> -OPFtB <sub>Mono</sub>   | Page 10 |
| <sup>19</sup> F-NMR spectrum for mPEG <sub>2k</sub> -OPFtB <sub>Mono</sub>  | Page 11 |
| MS spectrum and HPLC trace for mPEG <sub>2k</sub> -OPFtB <sub>Mono</sub>    | Page 12 |
| <sup>1</sup> H-NMR spectrum for mPEG <sub>1k</sub> -OPFtB <sub>Tri</sub>    | Page 13 |
| <sup>19</sup> F-NMR spectrum for mPEG <sub>1k</sub> -OPFtB <sub>Tri</sub>   | Page 14 |
| MS spectrum and HPLC trace for mPEG <sub>1k</sub> -OPFtB <sub>Tri</sub>     | Page 15 |
| <sup>1</sup> H-NMR spectrum for mPEG <sub>2k</sub> -OPFtB <sub>Tri</sub>    | Page 16 |
| <sup>19</sup> F-NMR spectrum for mPEG <sub>2k</sub> -OPFtB <sub>Tri</sub>   | Page 17 |
| MS spectrum and HPLC trace for mPEG <sub>2k</sub> -OPFtB <sub>Tri</sub>     | Page 18 |

|                                                                                                                                               |         |
|-----------------------------------------------------------------------------------------------------------------------------------------------|---------|
| <sup>1</sup> H-NMR spectrum for compound <b>2</b>                                                                                             | Page 19 |
| <sup>13</sup> C-NMR spectrum for compound <b>2</b>                                                                                            | Page 20 |
| <sup>1</sup> H-NMR spectrum for compound <b>3</b>                                                                                             | Page 21 |
| <sup>13</sup> C-NMR spectrum for compound <b>3</b>                                                                                            | Page 22 |
| <sup>19</sup> F-NMR spectrum for compound <b>3</b>                                                                                            | Page 23 |
| Enhanced contrast TEM image for micelles formed by mPEG <sub>1k</sub> -OPFtB <sub>Tri</sub>                                                   | Page 24 |
| T <sub>1</sub> and T <sub>2</sub> relaxation curves for mPEG <sub>1k</sub> -OPFtB <sub>Tri</sub> and mPEG <sub>2k</sub> -OPFtB <sub>Tri</sub> | Page 25 |



# <sup>1</sup>H-NMR (CDCl<sub>3</sub>, 400 MHz)

PROTON  
sed-l-19-lyop\_25May2011

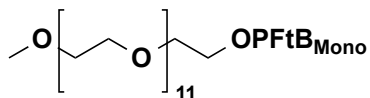

mPEG<sub>550</sub>-OPFtB<sub>Mono</sub>

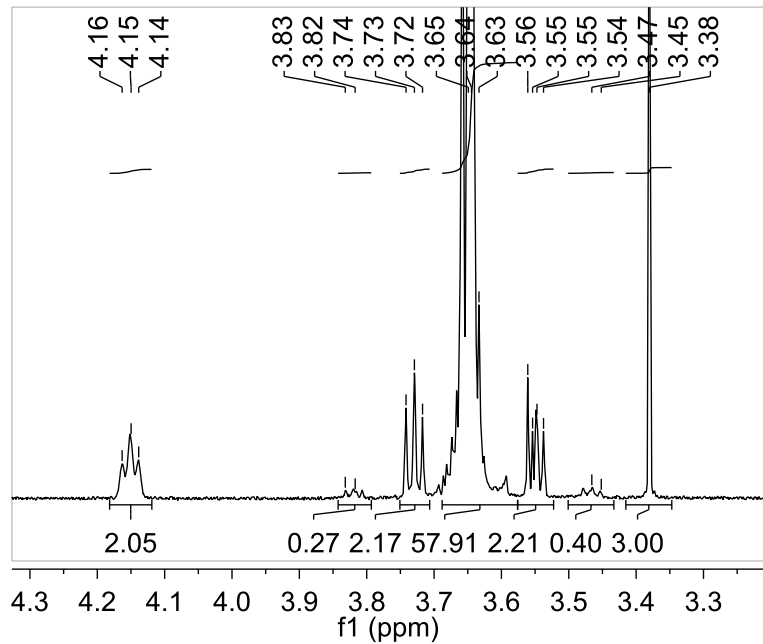

4.16  
4.15  
4.14  
3.83  
3.82  
3.74  
3.73  
3.72  
3.65  
3.64  
3.63  
3.56  
3.55  
3.55  
3.54  
3.47  
3.45  
3.38  
1.61

4.3 4.2 4.1 4.0 3.9 3.8 3.7 3.6 3.5 3.4 3.3  
f1 (ppm)

CHCl<sub>3</sub>

H<sub>2</sub>O

TMS

2.05 0.27 2.17 57.91 2.21 0.40 3.00 15.83

13 12 11 10 9 8 7 6 5 4 3 2 1 0 -1  
f1 (ppm)

# $^{19}\text{F}$ -NMR ( $\text{CDCl}_3$ , 400 MHz)

FLUORINE  
sed-l-19-dry\_23May2011

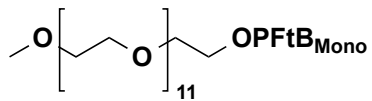

mPEG<sub>550</sub>-OPFtB<sub>Mono</sub>

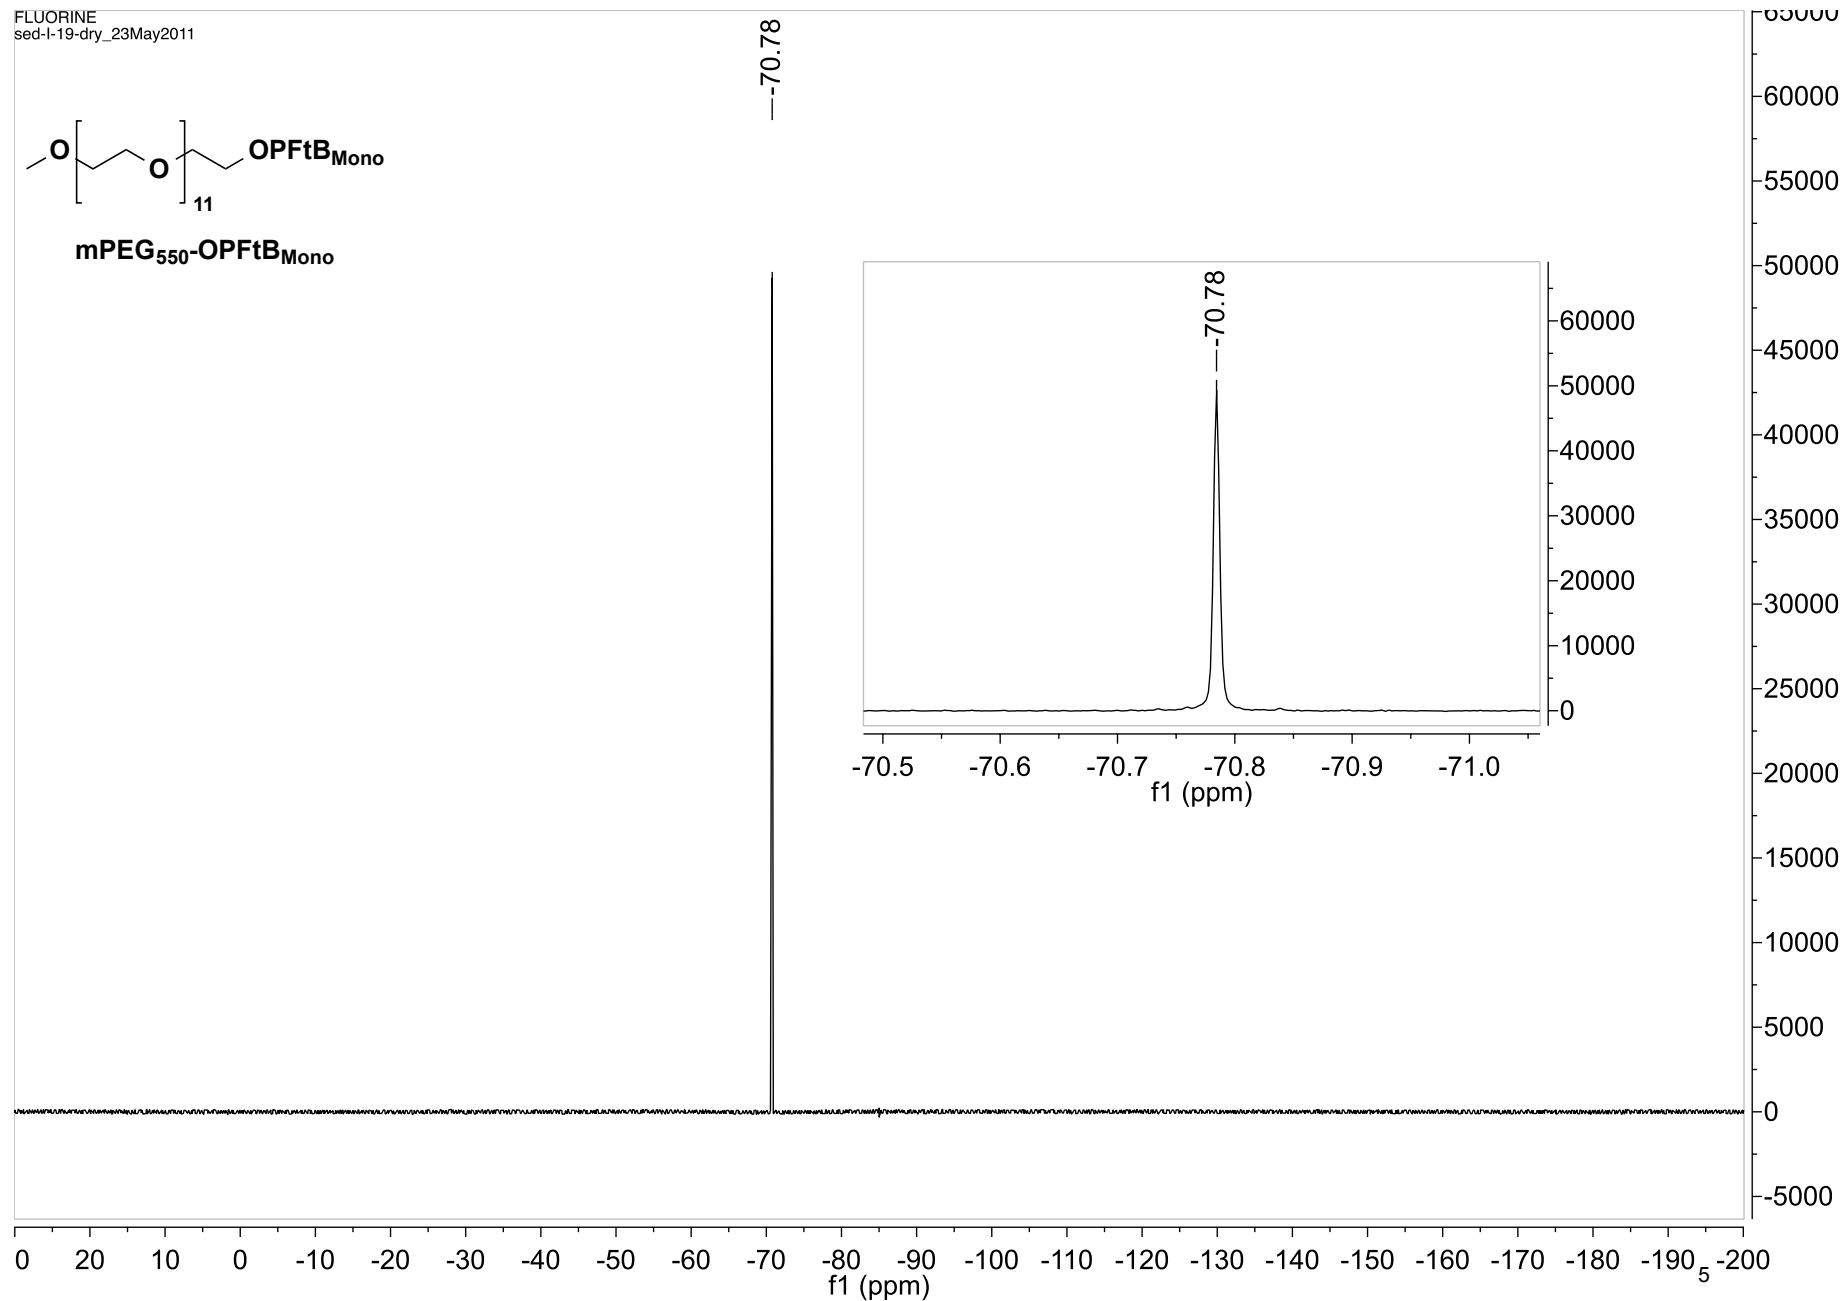









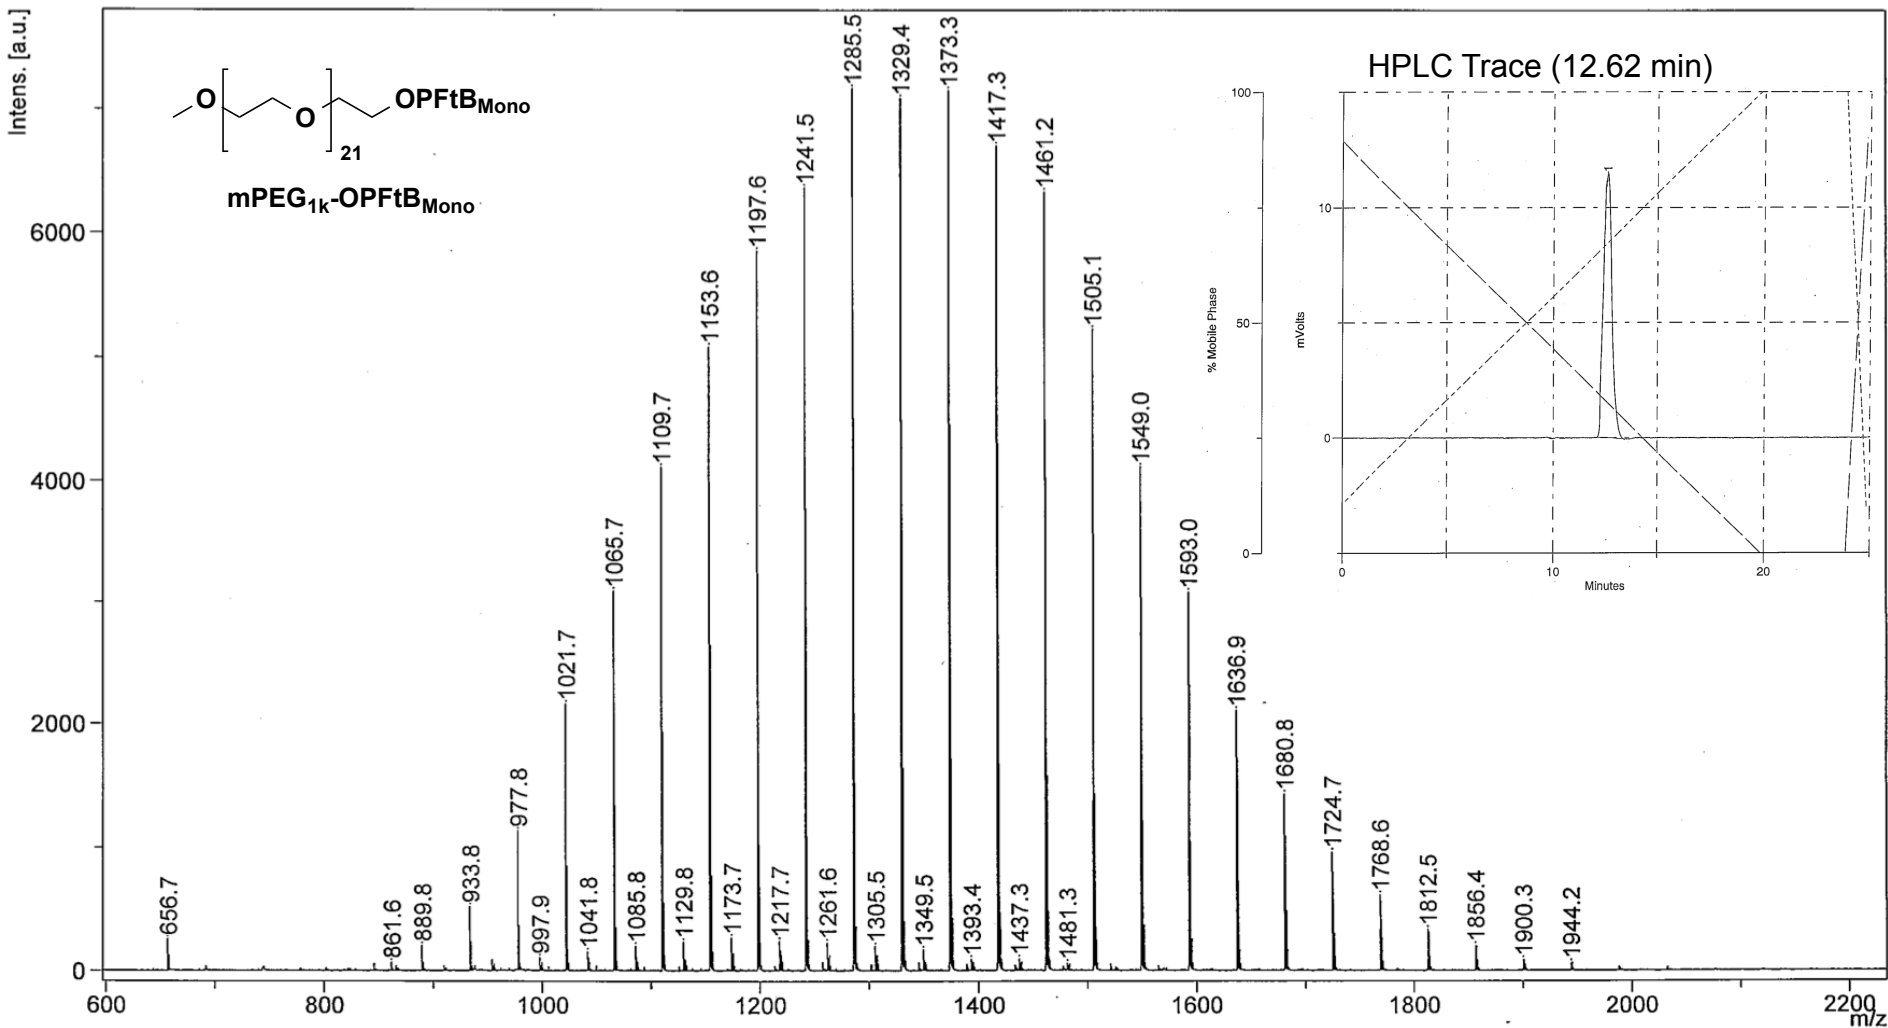



$^{19}\text{F}$ -NMR ( $\text{CDCl}_3$ , 400 MHz)

FLUORINE  
sed-l-8-check\_18May2011

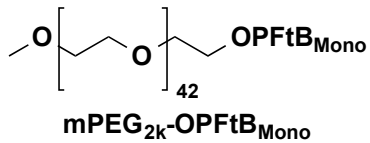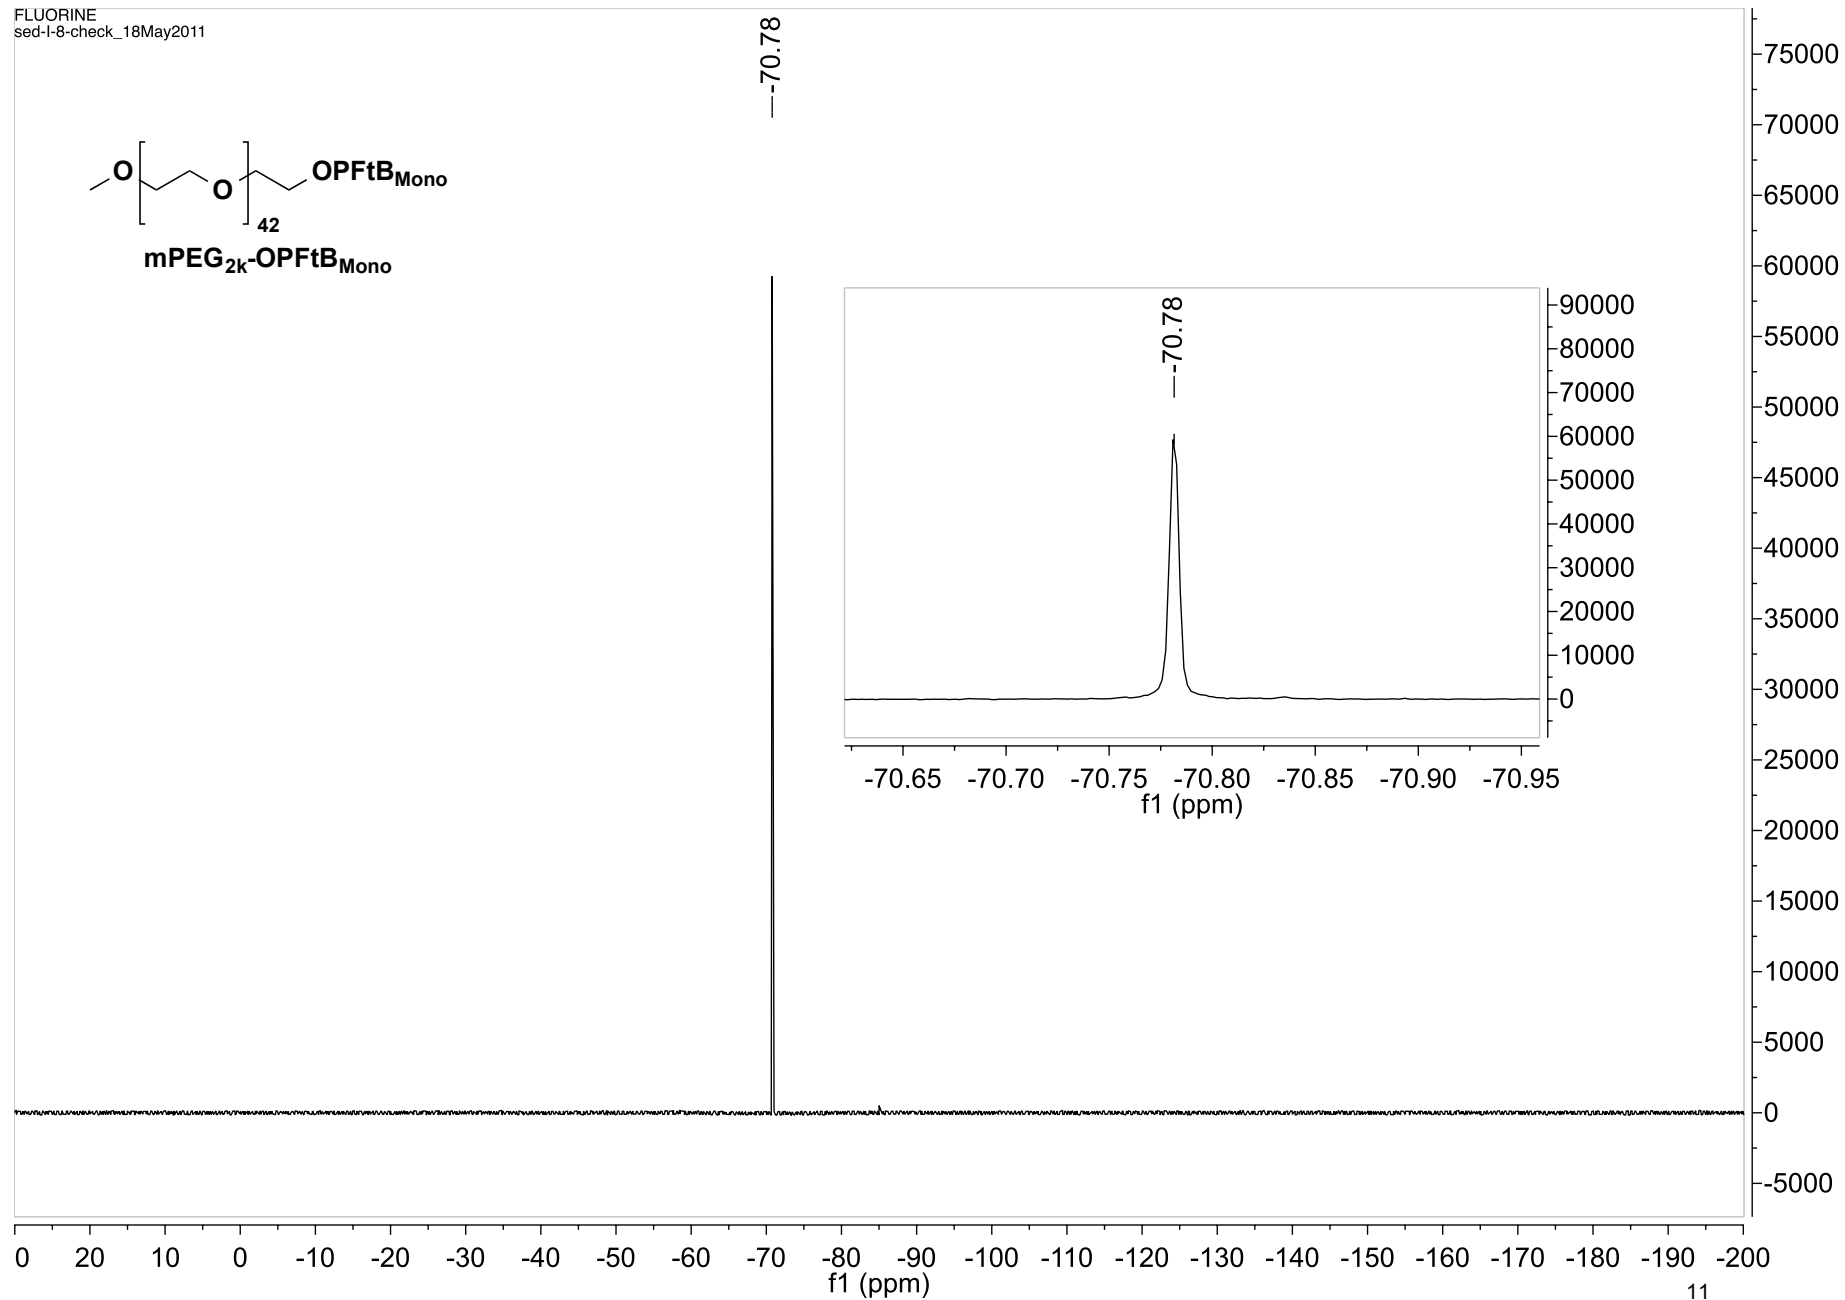









# $^1\text{H-NMR}$ ( $\text{CDCl}_3$ , 400 MHz)

PROTON  
TAB-I-34-lyo-30mg\_01Oct2013

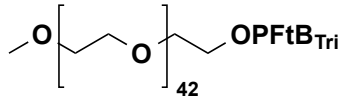

mPEG<sub>2k</sub>-OPFtB<sub>Tri</sub>

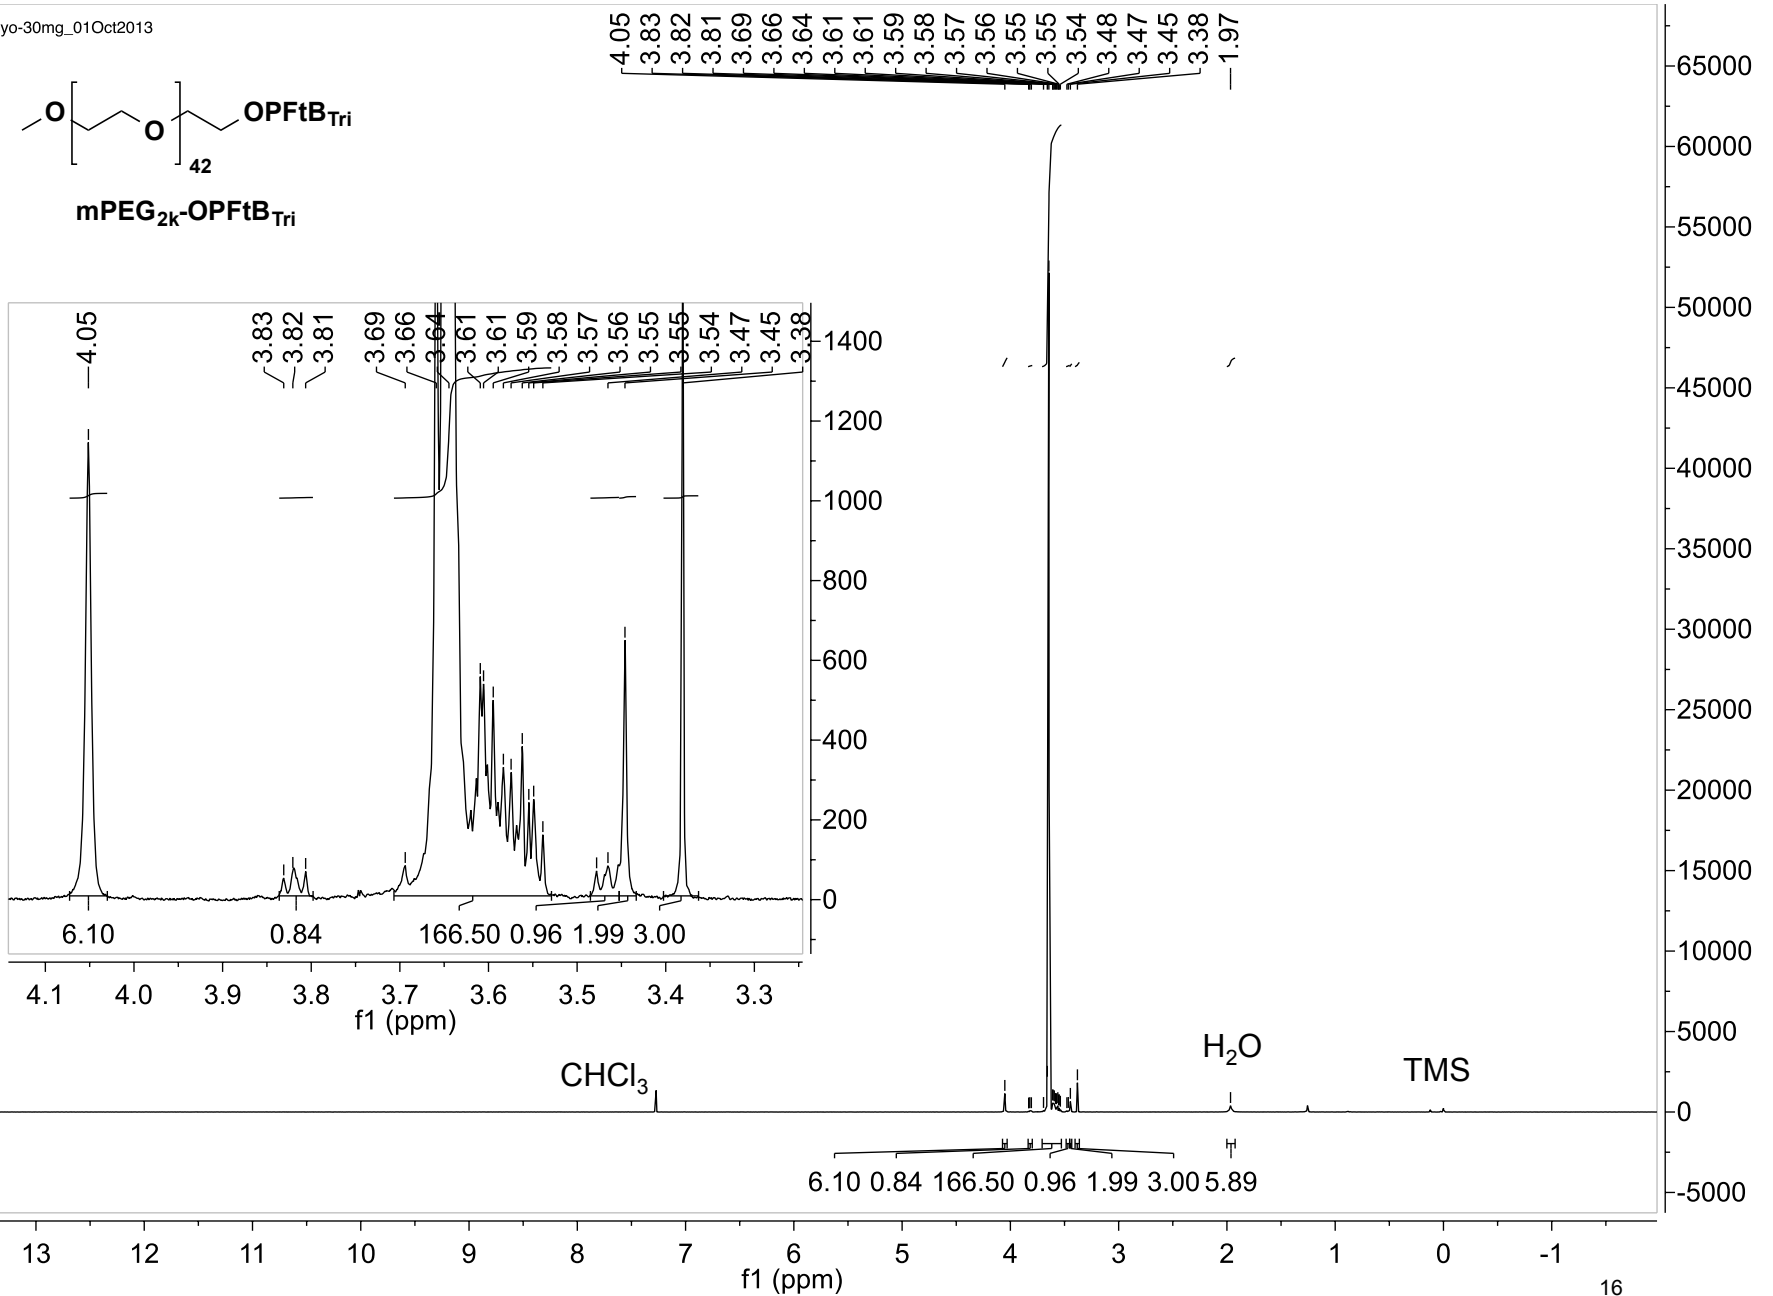



<sup>19</sup>F-NMR (CDCl<sub>3</sub>, 400 MHz)

FLUORINE  
TAB-I-34-lyo-30mg\_01Oct2013

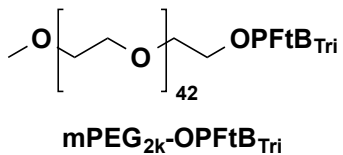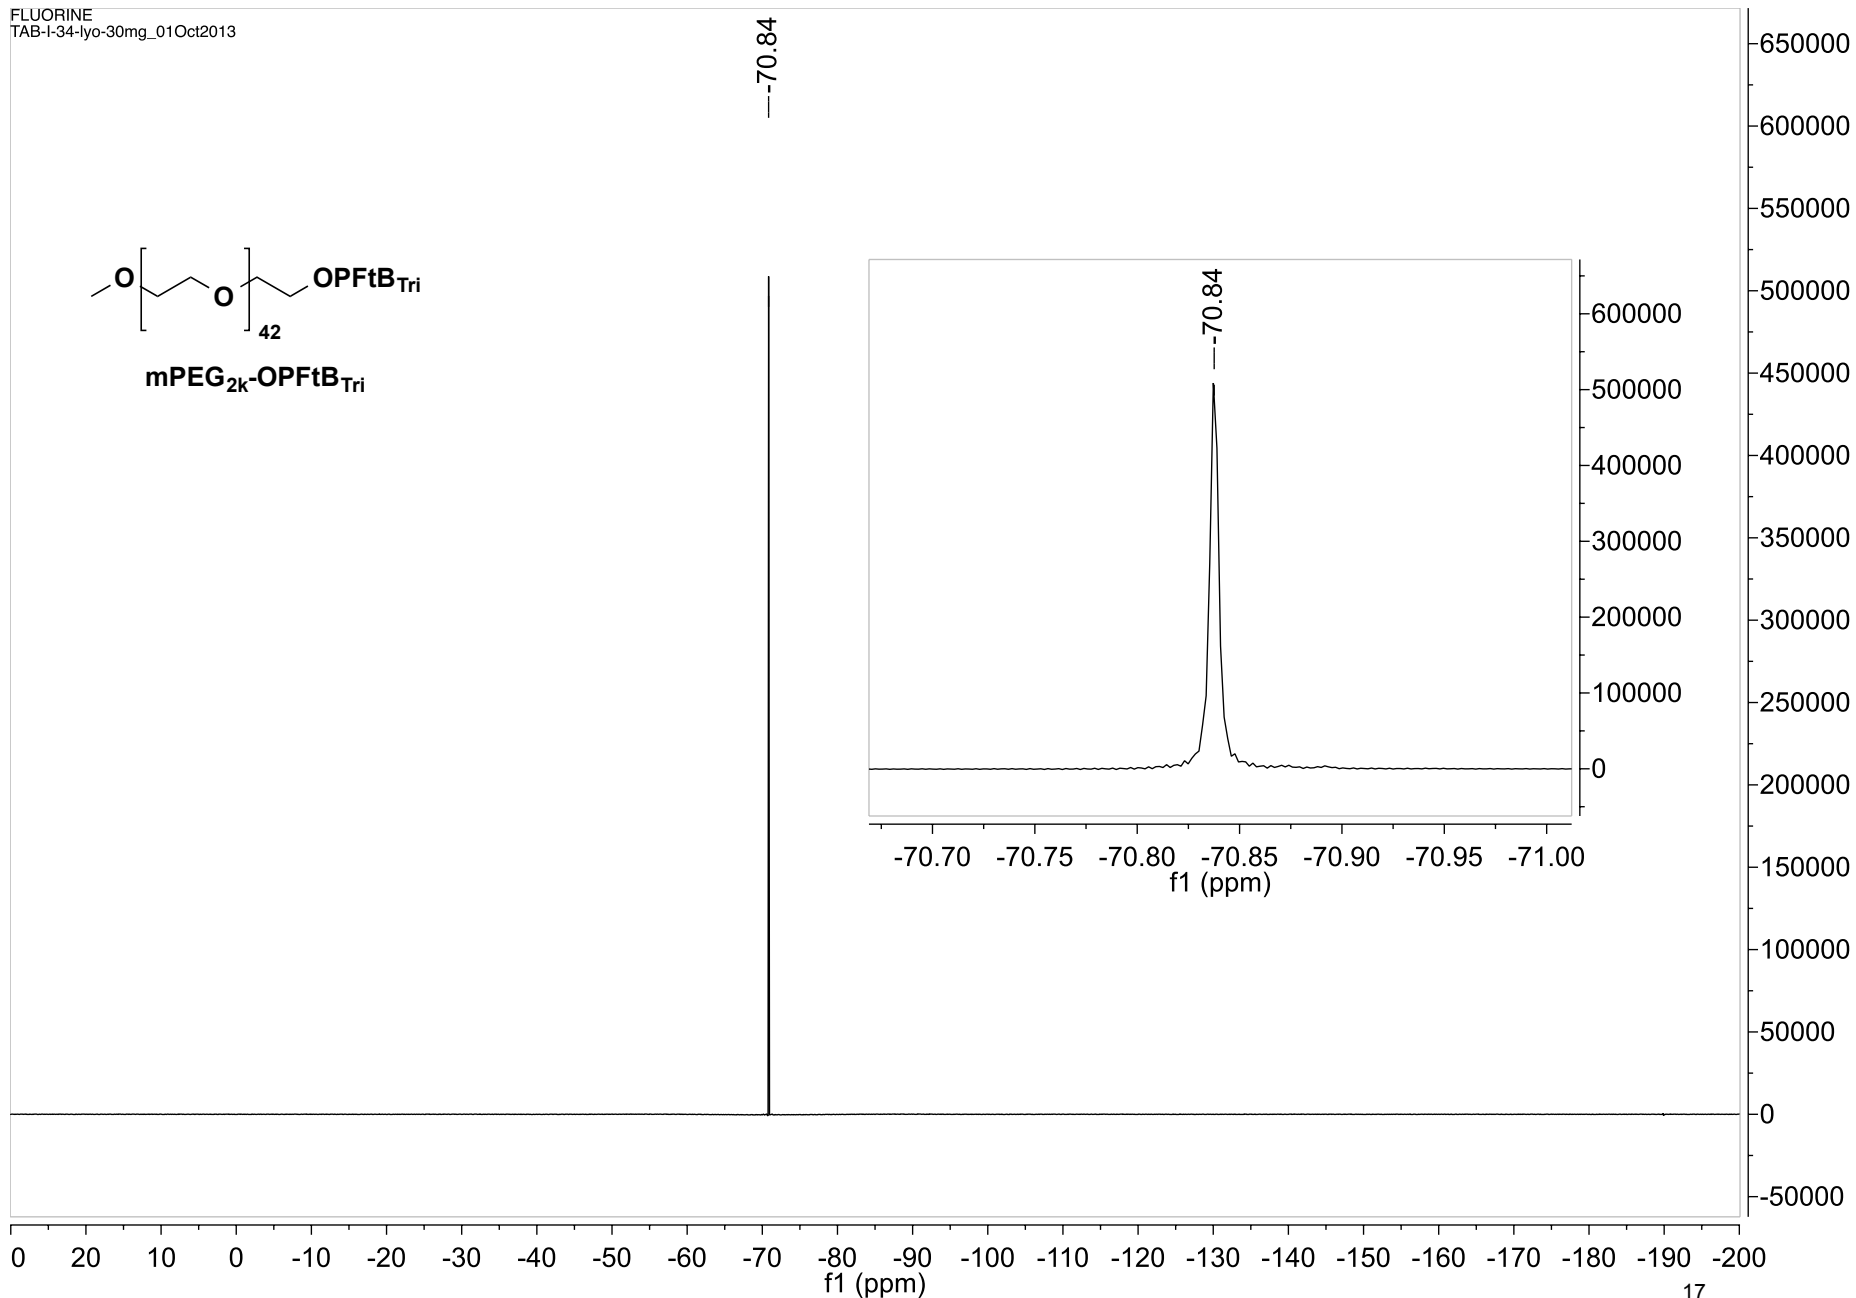

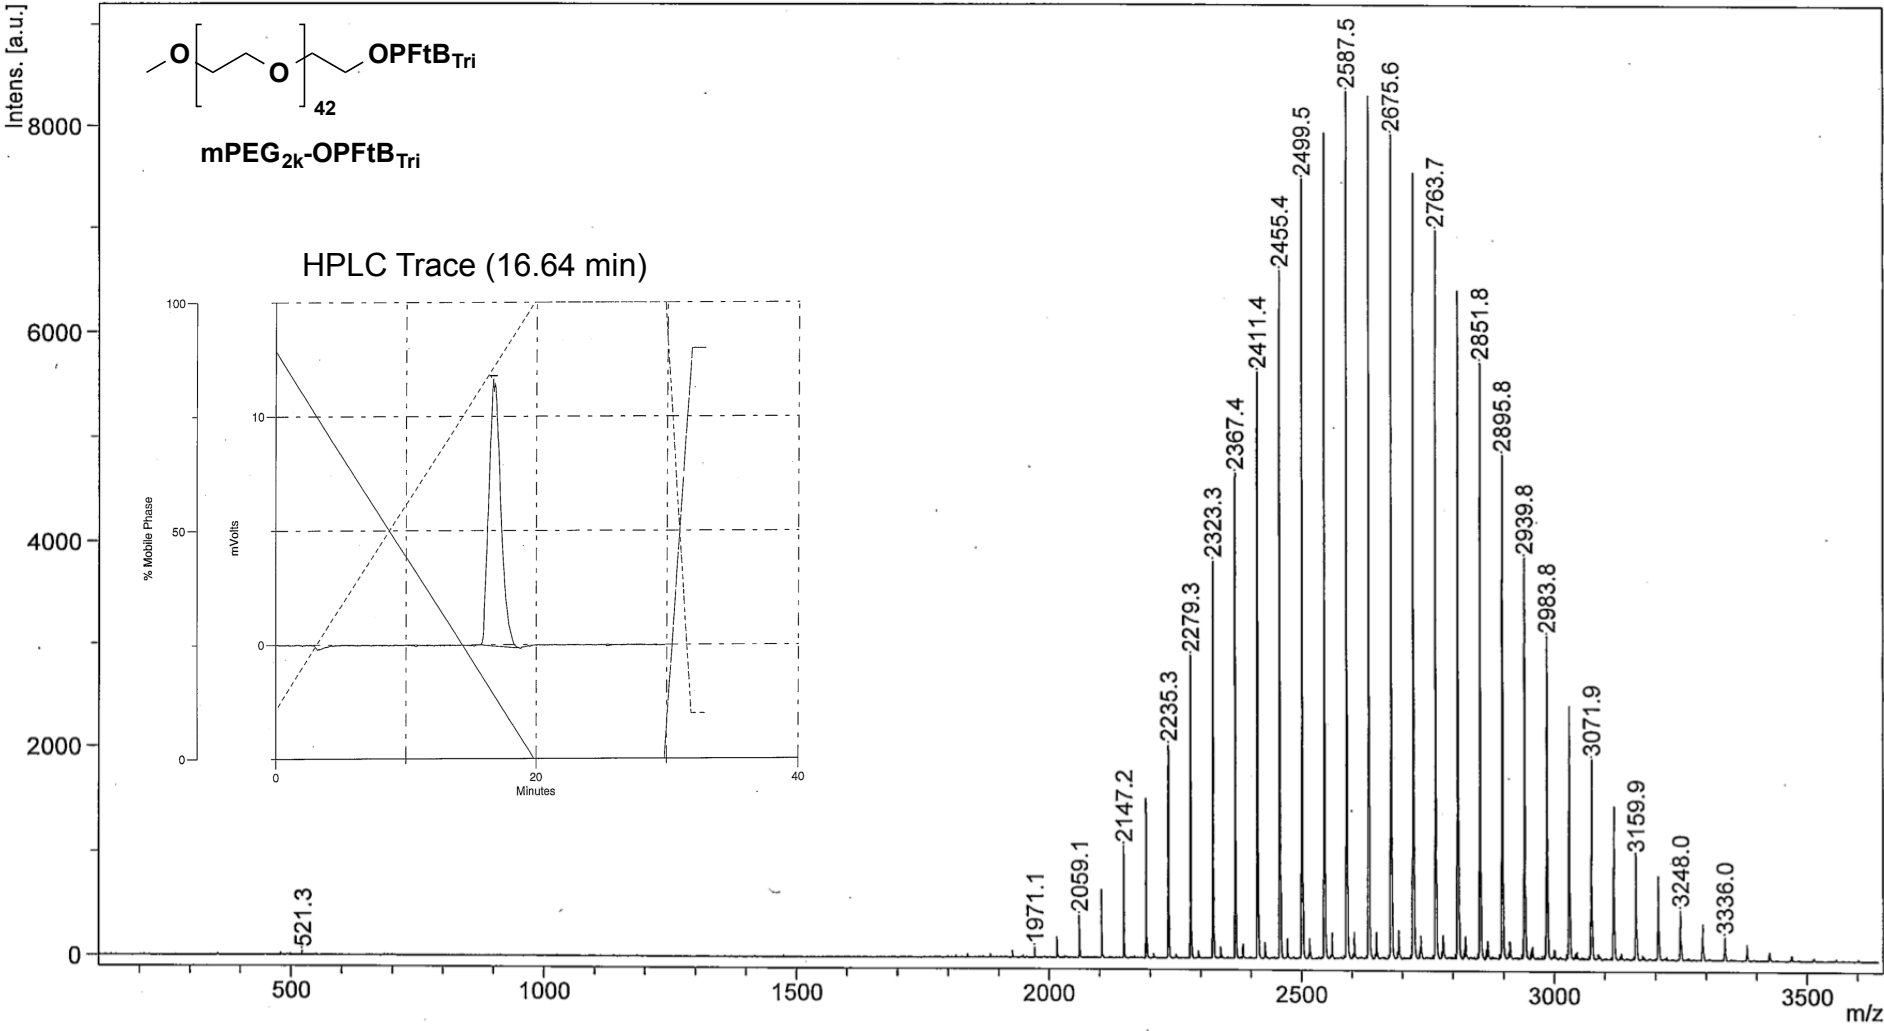

# <sup>1</sup>H-NMR (CDCl<sub>3</sub>, 400 MHz)

PROTON  
EJM-I-22A\_06Sep2013

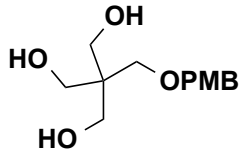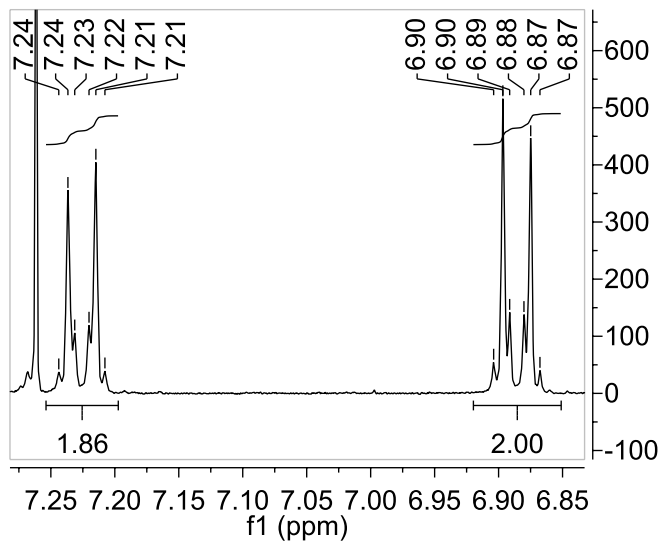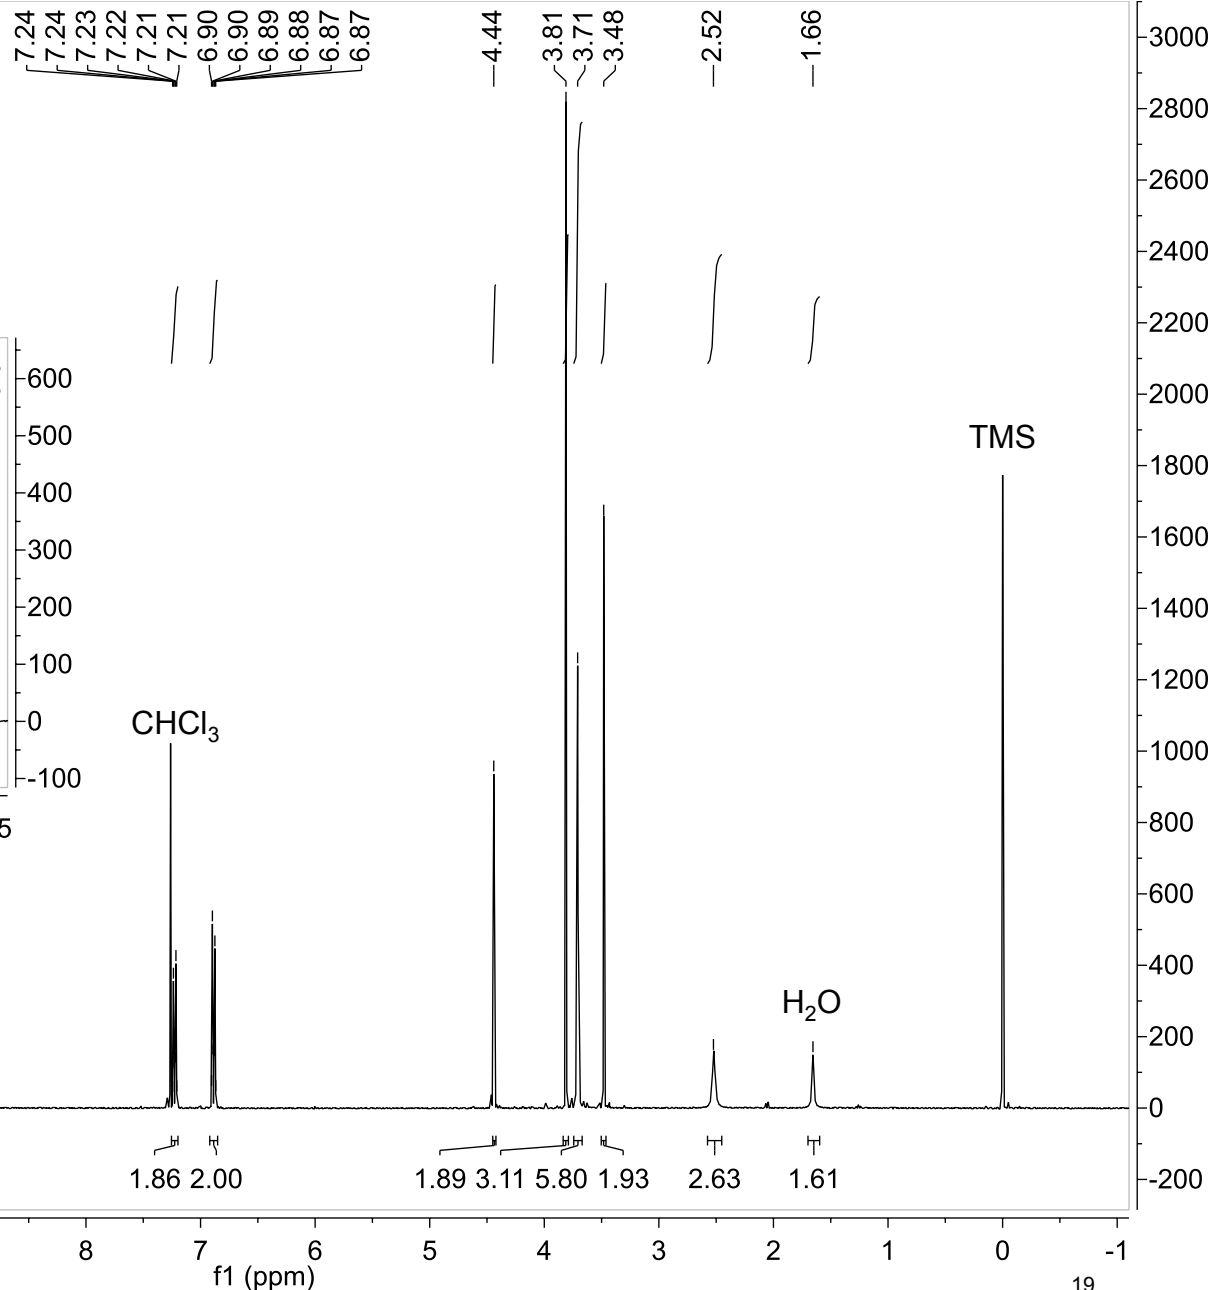

$^{13}\text{C}\{^1\text{H}\}$ -NMR ( $\text{CDCl}_3$ , 100 MHz)

CARBON  
EJM-I-45\_21Mar2014

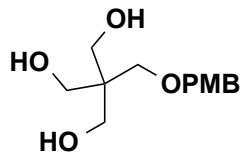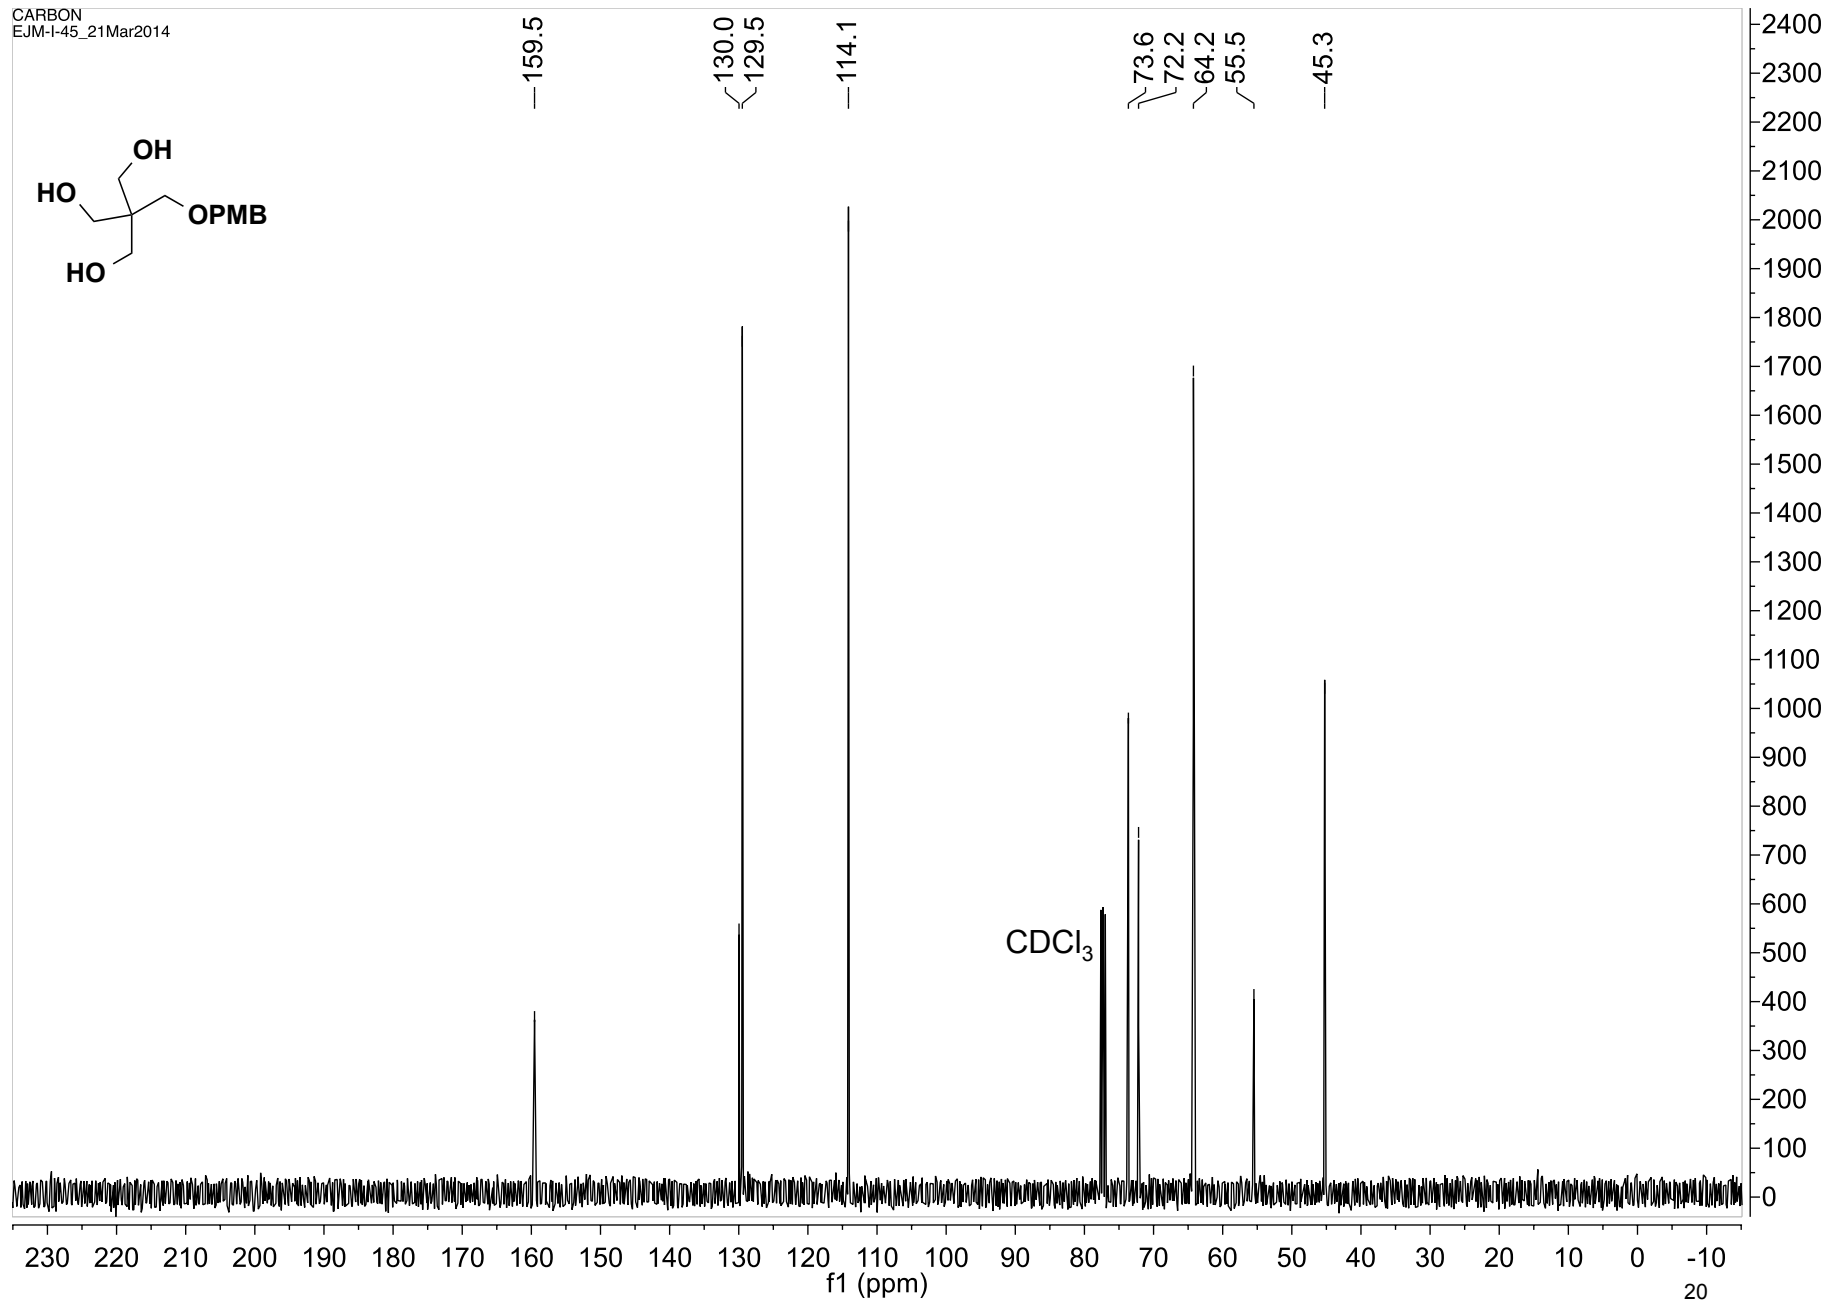

# $^1\text{H-NMR}$ ( $\text{CDCl}_3$ , 400 MHz)

PROTON  
EJM-I-42\_13Mar2014

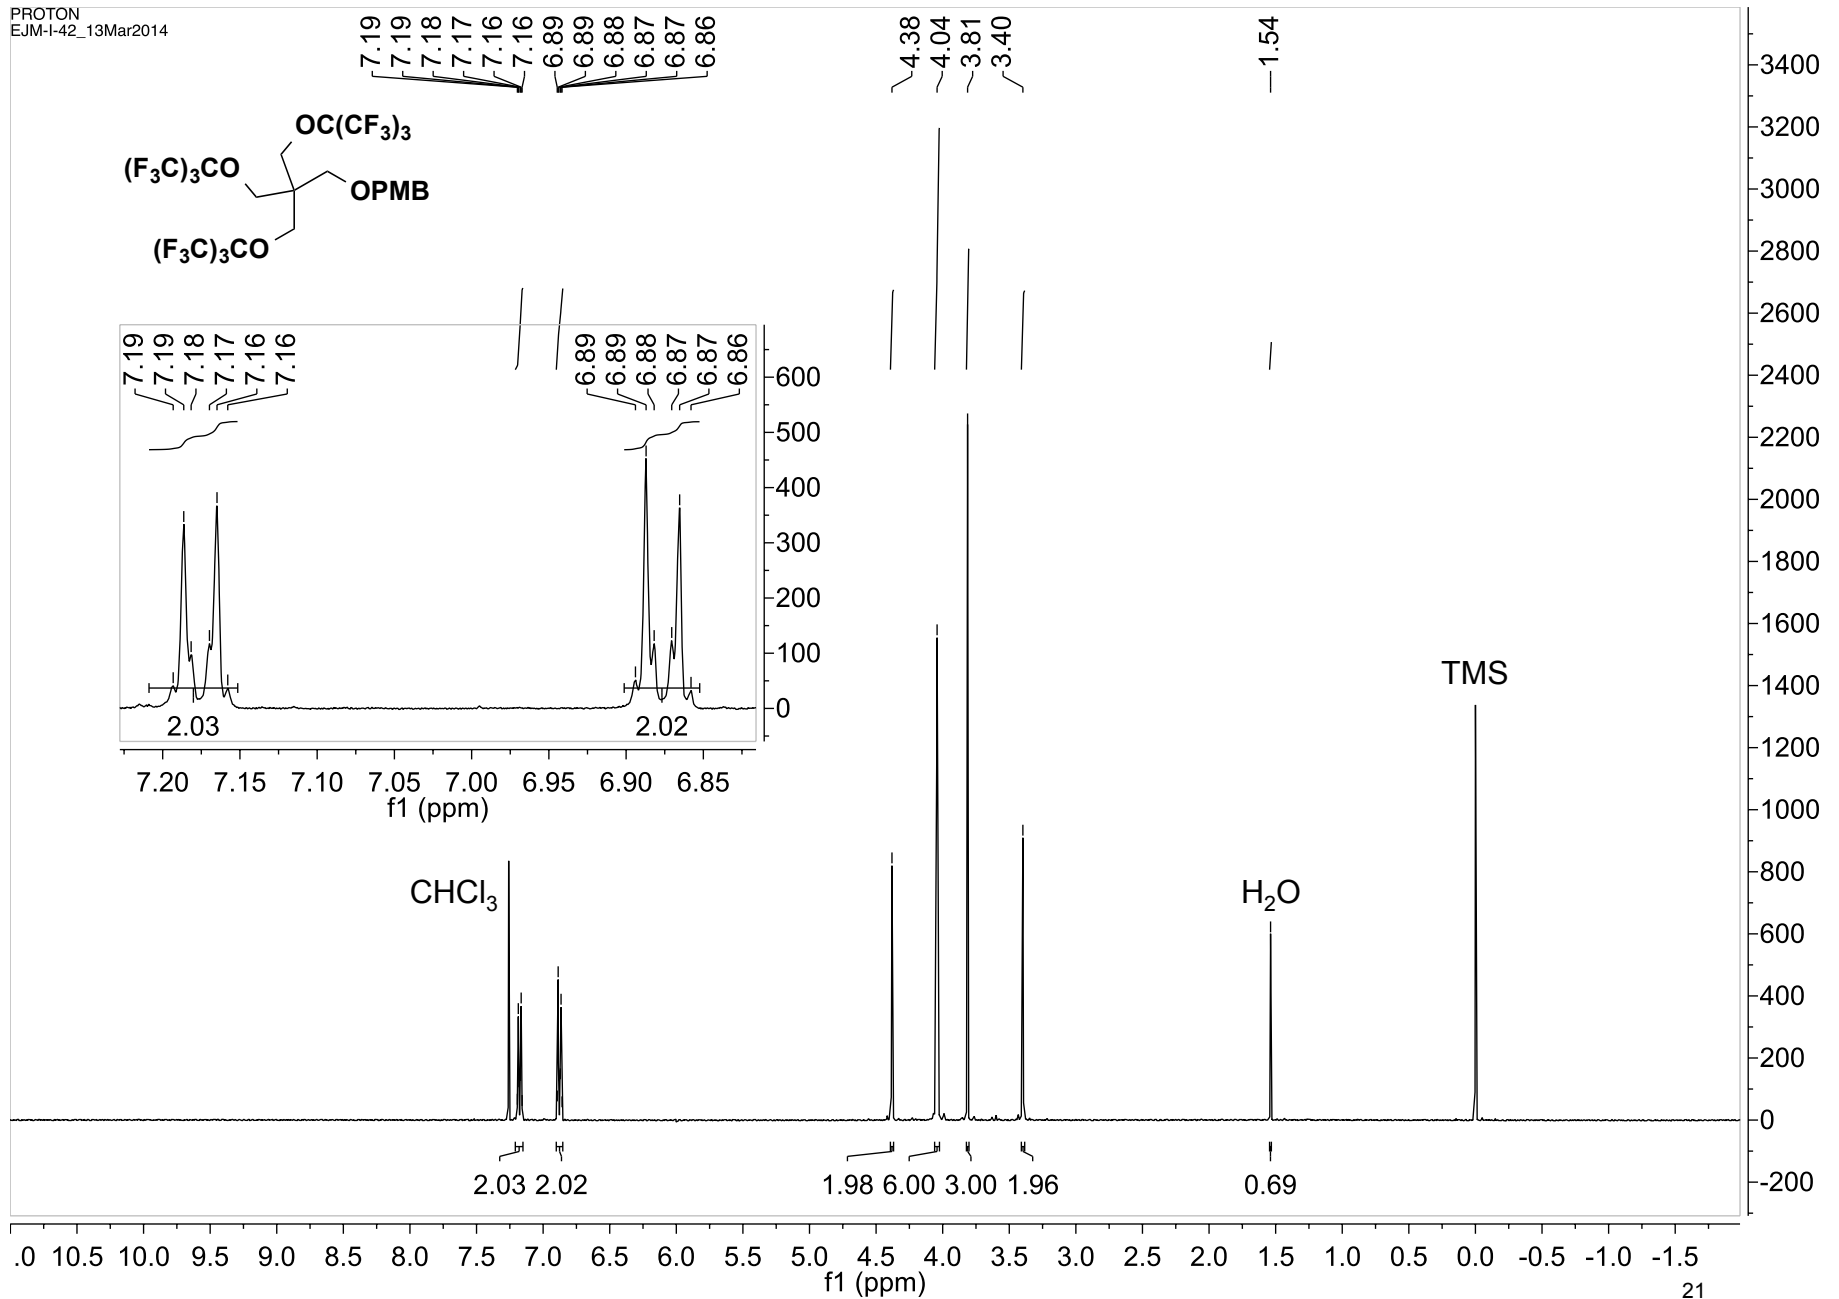

$^{13}\text{C}\{^1\text{H}\}$ -NMR ( $\text{CDCl}_3$ , 100 MHz)

CARBON  
SED-II-28-31-34\_23Apr2013

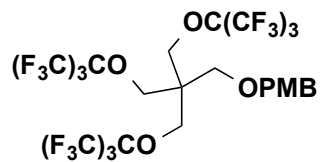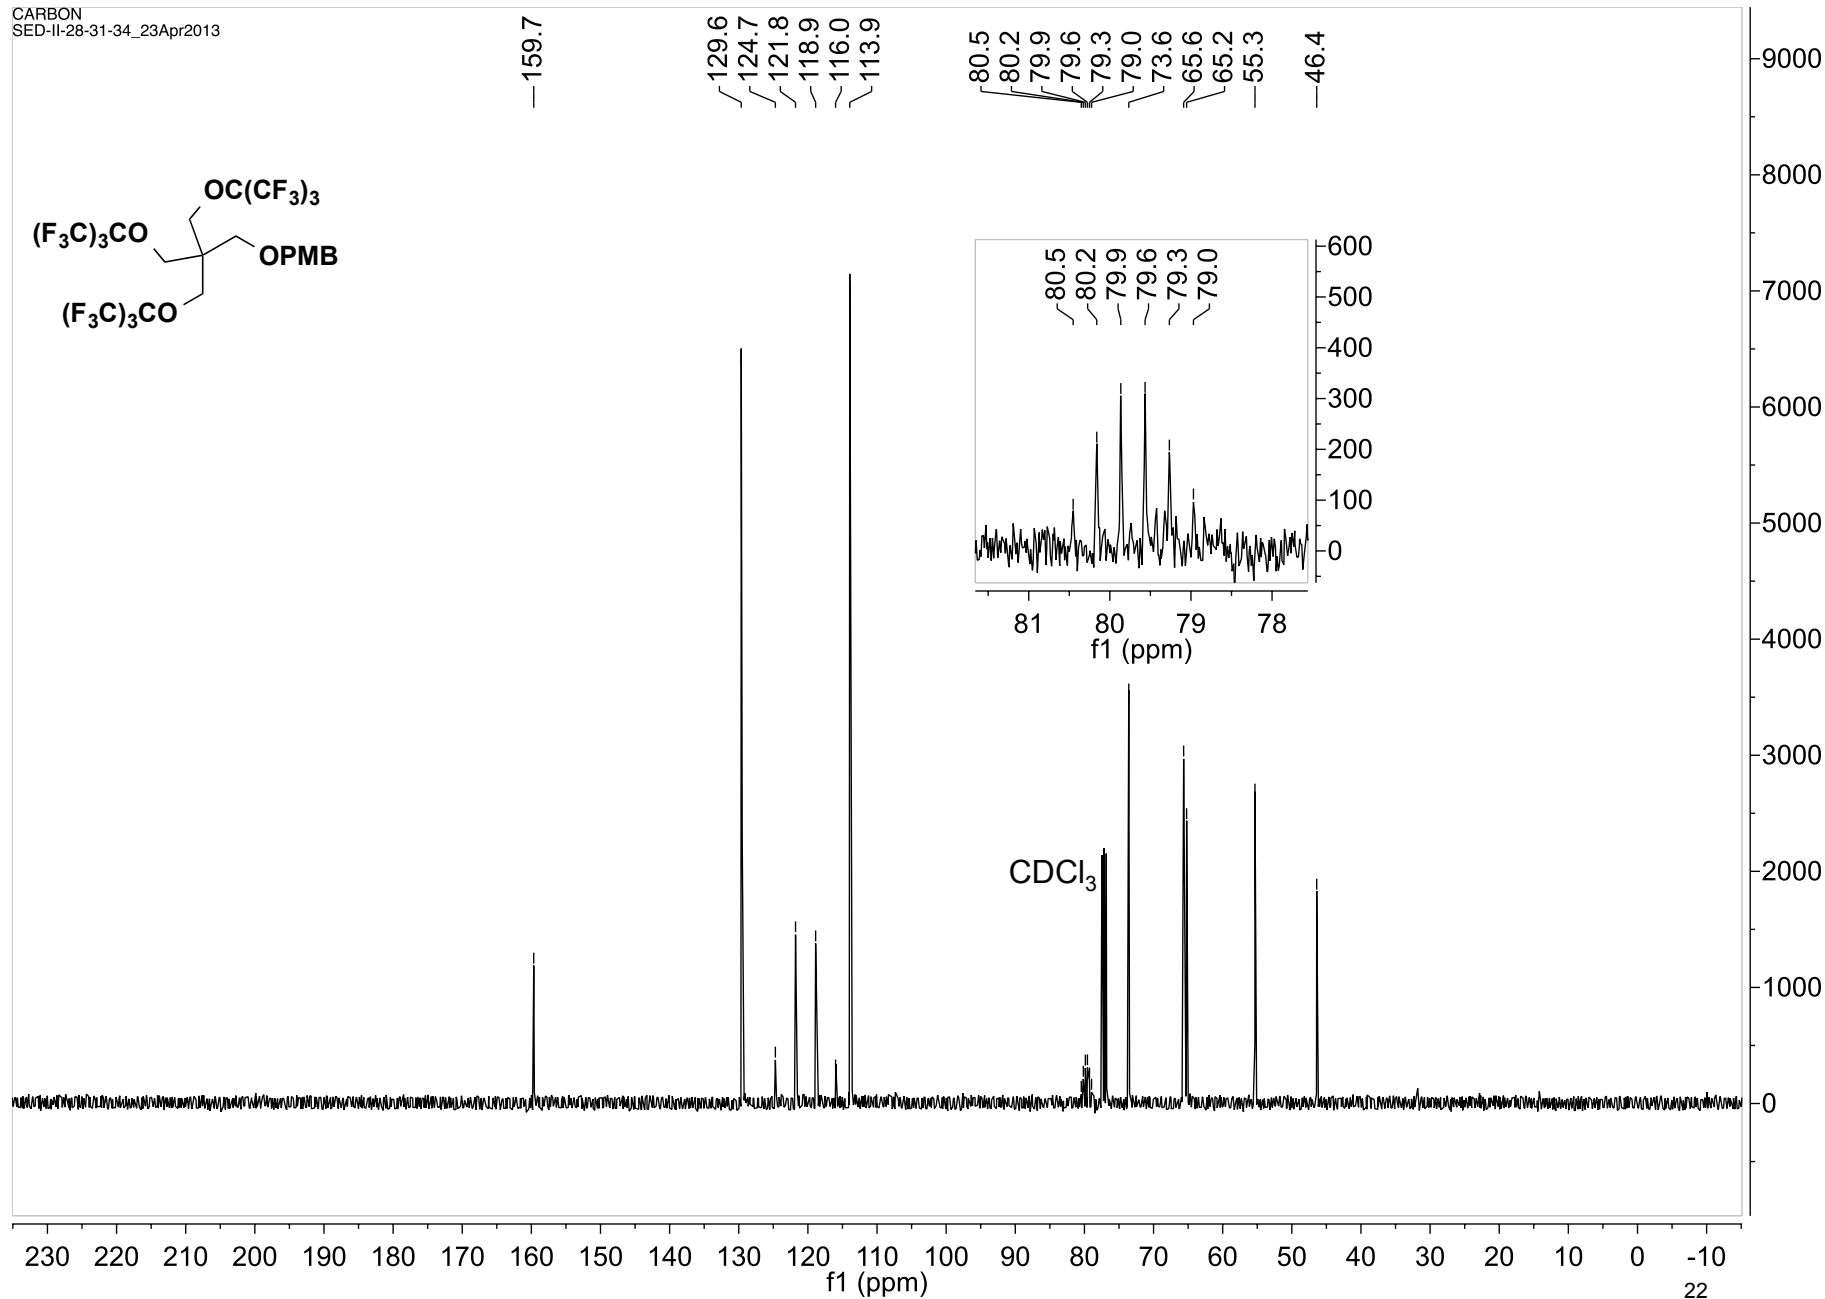

<sup>19</sup>F-NMR (CDCl<sub>3</sub>, 400 MHz)

FLUORINE  
EJM-I-42\_13Mar2014

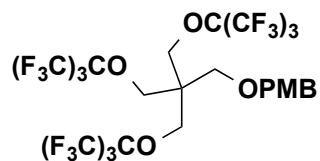

--70.84

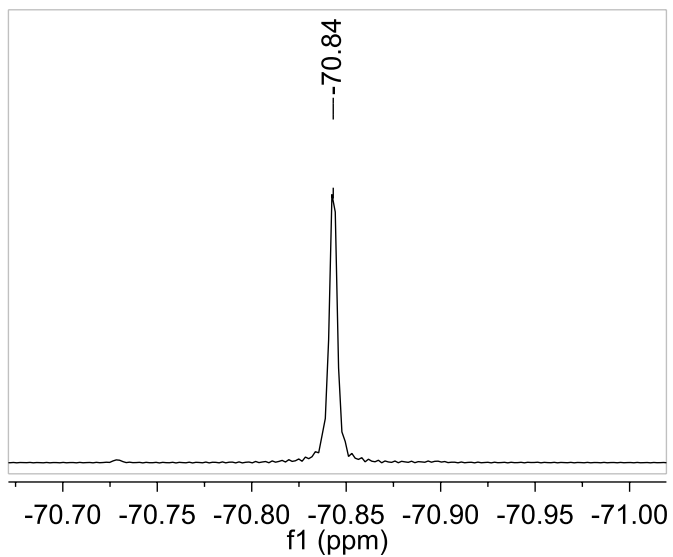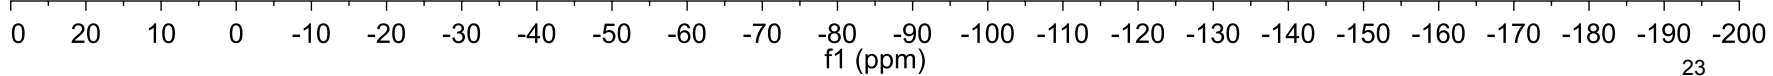

# Enhanced contrast TEM image

Contrast has been increased uniformly over the entire image for clarity.

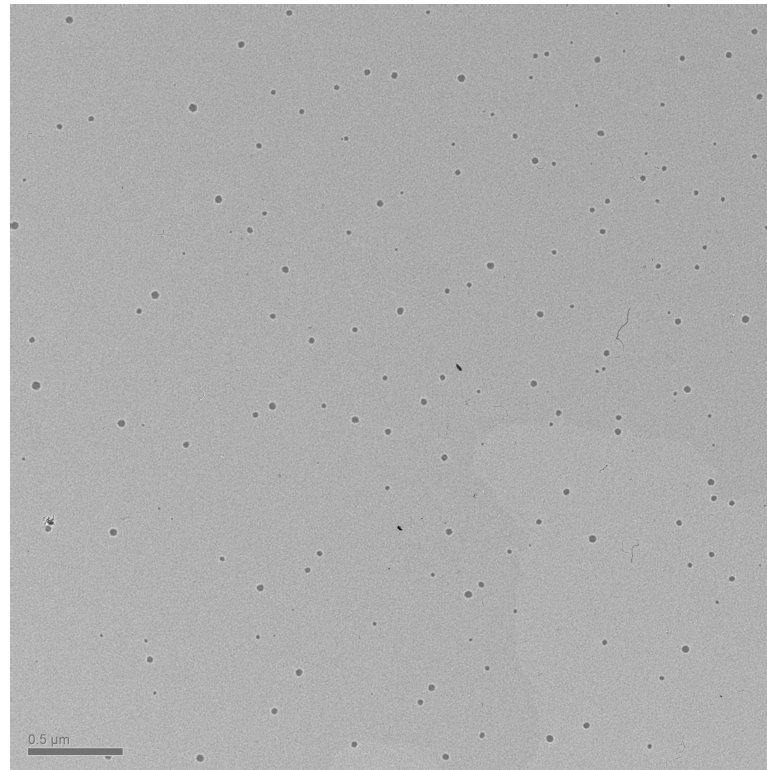

TEM image of mPEG<sub>1k</sub>-OPFtB<sub>TRI</sub> micelles, scale bar: 0.5 μm.  
Due to difficulties in achieving contrast, an aqueous solution of polymer was dried and then imaged.



# mPEG<sub>1k</sub>-OPFtB<sub>TRI</sub>

**T<sub>1</sub> : mPEG<sub>1k</sub>PFtB<sub>TRI</sub>**

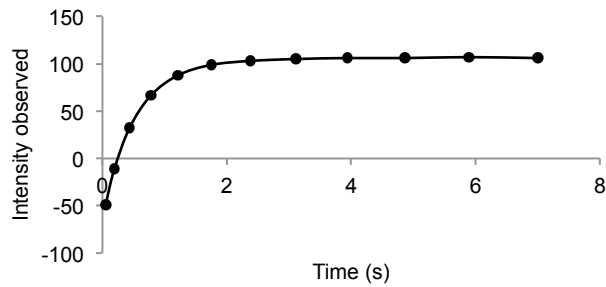

**T<sub>2</sub> : mPEG<sub>1k</sub>PFtB<sub>TRI</sub>**

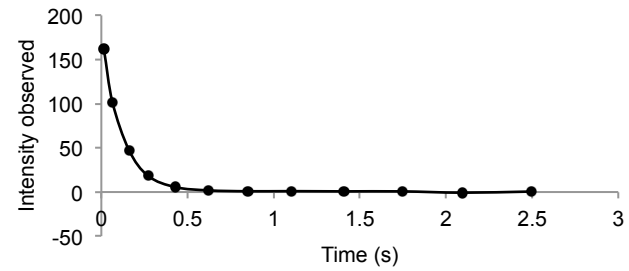

**T<sub>1</sub> : mPEG<sub>2k</sub>PFtB<sub>TRI</sub>**

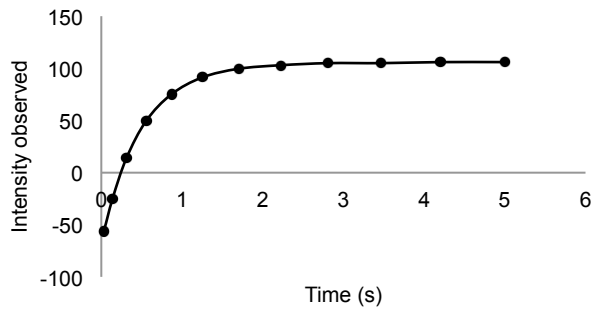

**T<sub>2</sub> : mPEG<sub>2k</sub>PFtB<sub>TRI</sub>**

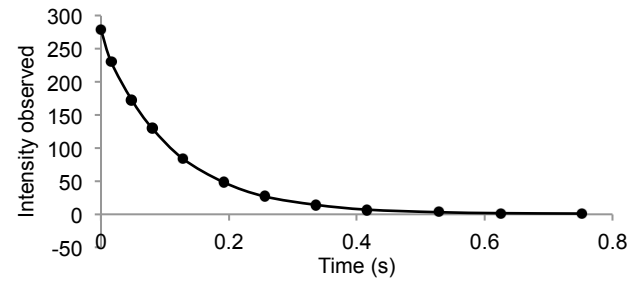

Supplement: NIHMS620115-supplement-ESI.pdf [file NIHMS620115-supplement-ESI.pdf]
